# Supplementary material for: Self-assembled surfactant cyclic peptide nanostructures as stabilizing agents
Source: Royal Society of Chemistry journal article supplement (doi:10.1039/c3sm50764e), 2013-01-01
Supplement: c3sm50764e.pdf [file c3sm50764e.pdf]

## Supplementary Information

### Self-Assembled Surfactant Cyclic Peptide Nanostructures as Stabilizing Agents

**Dindyal Mandal,<sup>a,†,\*</sup> Rakesh K. Tiwari,<sup>a,b,‡</sup> Amir Nasrolahi Shirazi,<sup>a,‡</sup> Donghoon Oh,<sup>a</sup>  
Guofeng Ye,<sup>a</sup> Antara Banerjee,<sup>c</sup> Arpita Yadav,<sup>c</sup> Keykavous Parang<sup>a,b,\*</sup>**

<sup>a</sup>*Department of Biomedical and Pharmaceutical Sciences, College of Pharmacy, University of Rhode Island, Kingston, Rhode Island 02881, USA*

<sup>b</sup>*One University Drive, School of Pharmacy, Chapman University, Orange, California 92866, USA*

<sup>c</sup>*Department of Chemistry, University Institute of Engineering and Technology, Chhatrapati Shahuji Maharaj University, Kanpur 208024, India*

**\*Corresponding author.** 7 Greenhouse Road, Department of Biomedical and Pharmaceutical Sciences, College of Pharmacy, University of Rhode Island, Kingston, Rhode Island, 02881, USA or Johns Hopkins University School of Medicine, 725 N. Wolfe St. Baltimore, MD, 21205, USA; Tel.: +1-401-874-4471; Fax: +1-401-874-5787; E-mail address: kparang@uri.edu.

<sup>†</sup>Present address: School of Biotechnology, KIIT University, Bhubaneswar, Orissa, India  
Email: ddmandal@gmail.com

<sup>‡</sup>These authors contributed equally.

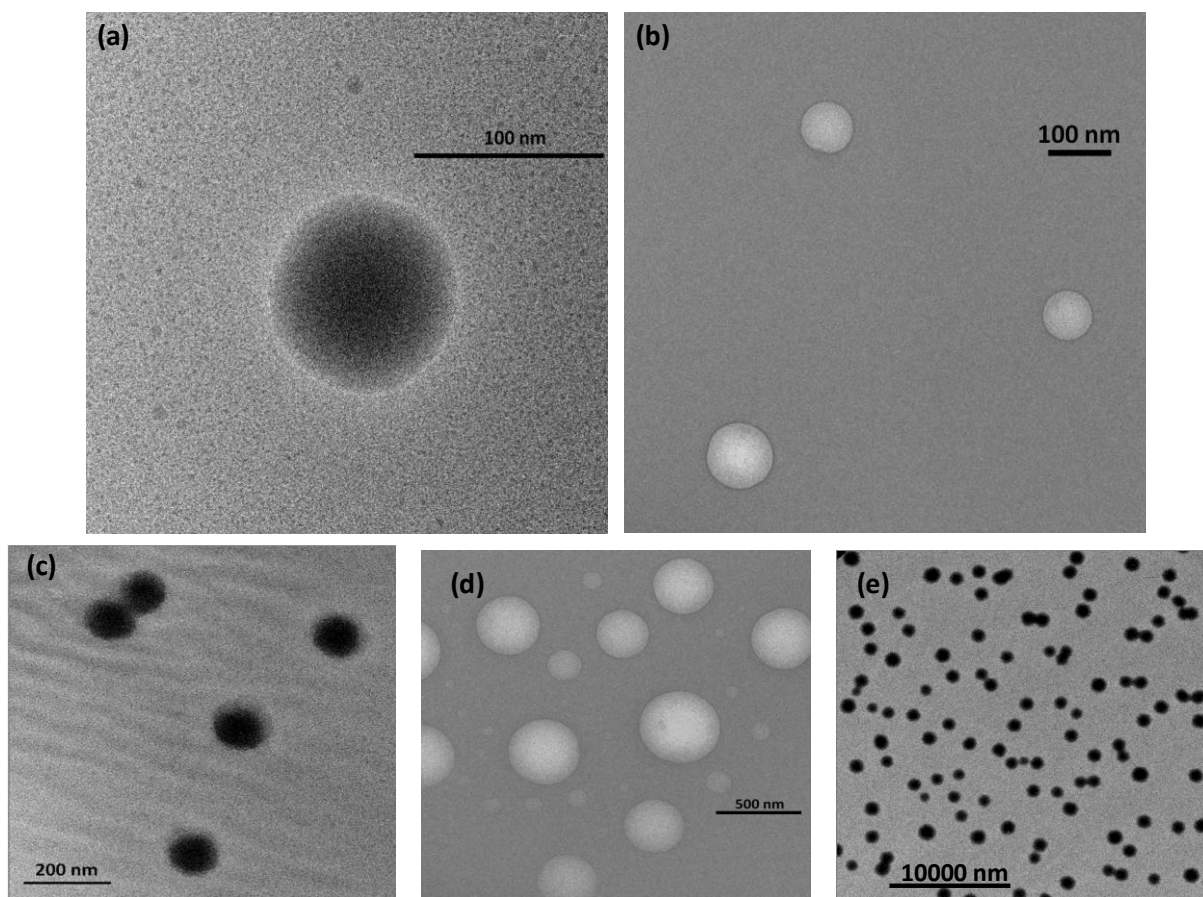

**Fig. S1.** (a) and (b) Conventional TEM image of nanostructure formation from  $[WR]_4$  (4 days aged peptide solution, size 70-85 nm) (without negative staining); (c) TEM images of self-assembled structures of  $[WR]_3$  in water after 2 weeks (without negative staining); (d) TEM images of self-assembled structures of  $[WR]_4$  in water after 2 weeks (without negative staining); (e) TEM images of self-assembled structures of  $[WR]_5$  in water after 2 weeks (without negative staining).

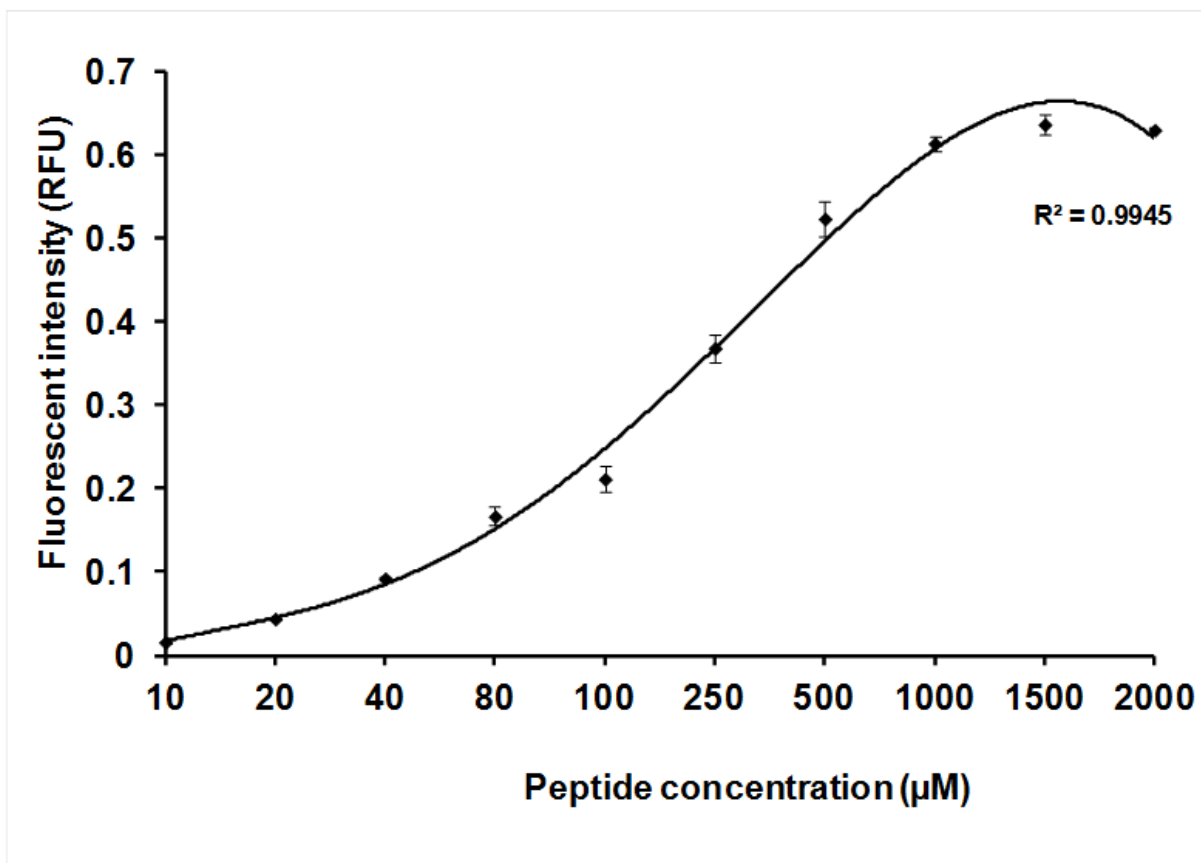

Fig. S2. Concentration-dependent fluorescence of [WR]<sub>4</sub>.

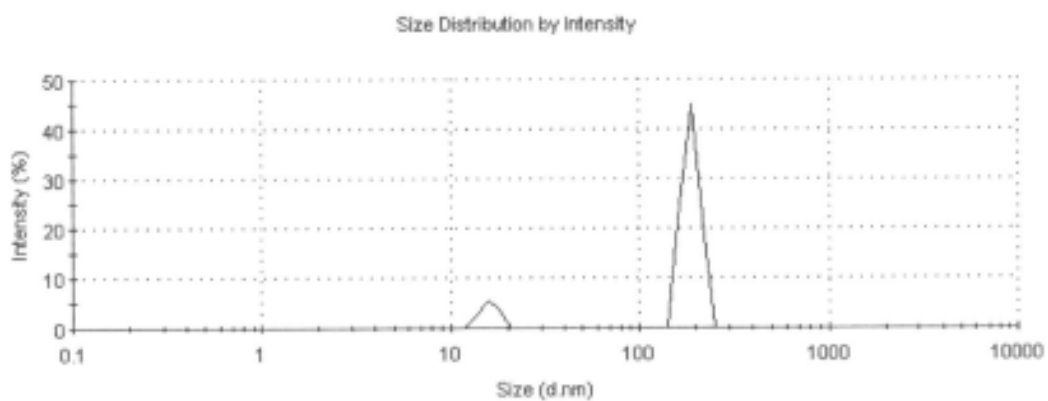

**Fig. S3.** DLS size distribution of nanostructures formed by [WR]<sub>5</sub> (100 μM aqueous solution).

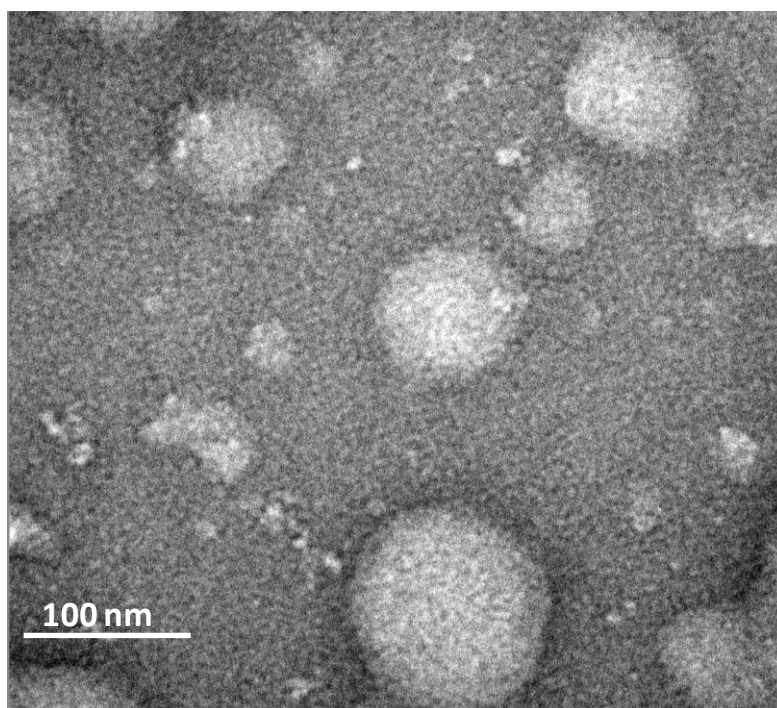

**Fig. S4.** TEM image of [WR]<sub>5</sub> in water (2 mM) after 12 days.

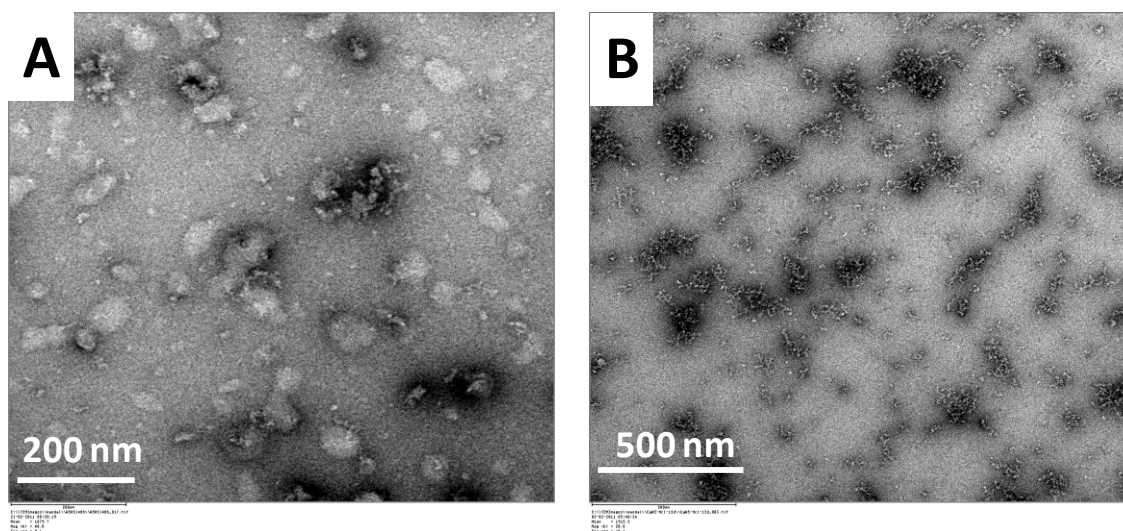

**Fig. S5.** Negatively stained TEM images of self-assembly of  $[WR]_5$  (2 mM) in 0.02 N HCl after 48 h (A) and 12 days (B).

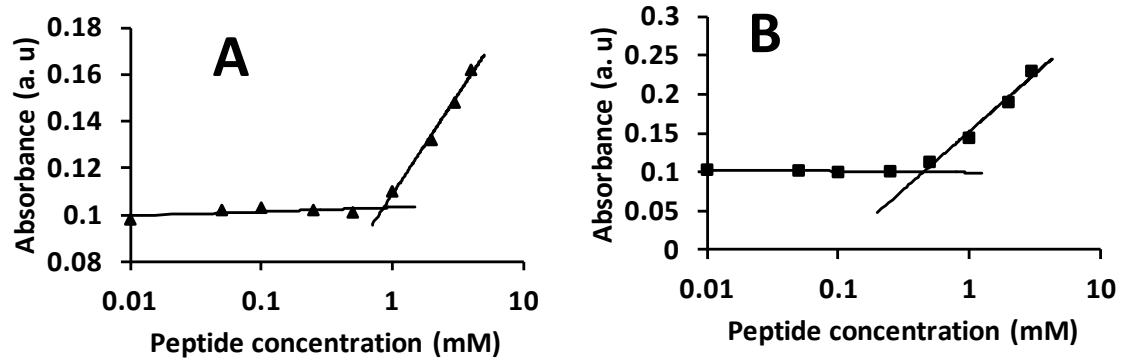

**Fig. S6.** Turbidity measurements of  $[WR]_5$  in water (A) and in PBS (B).

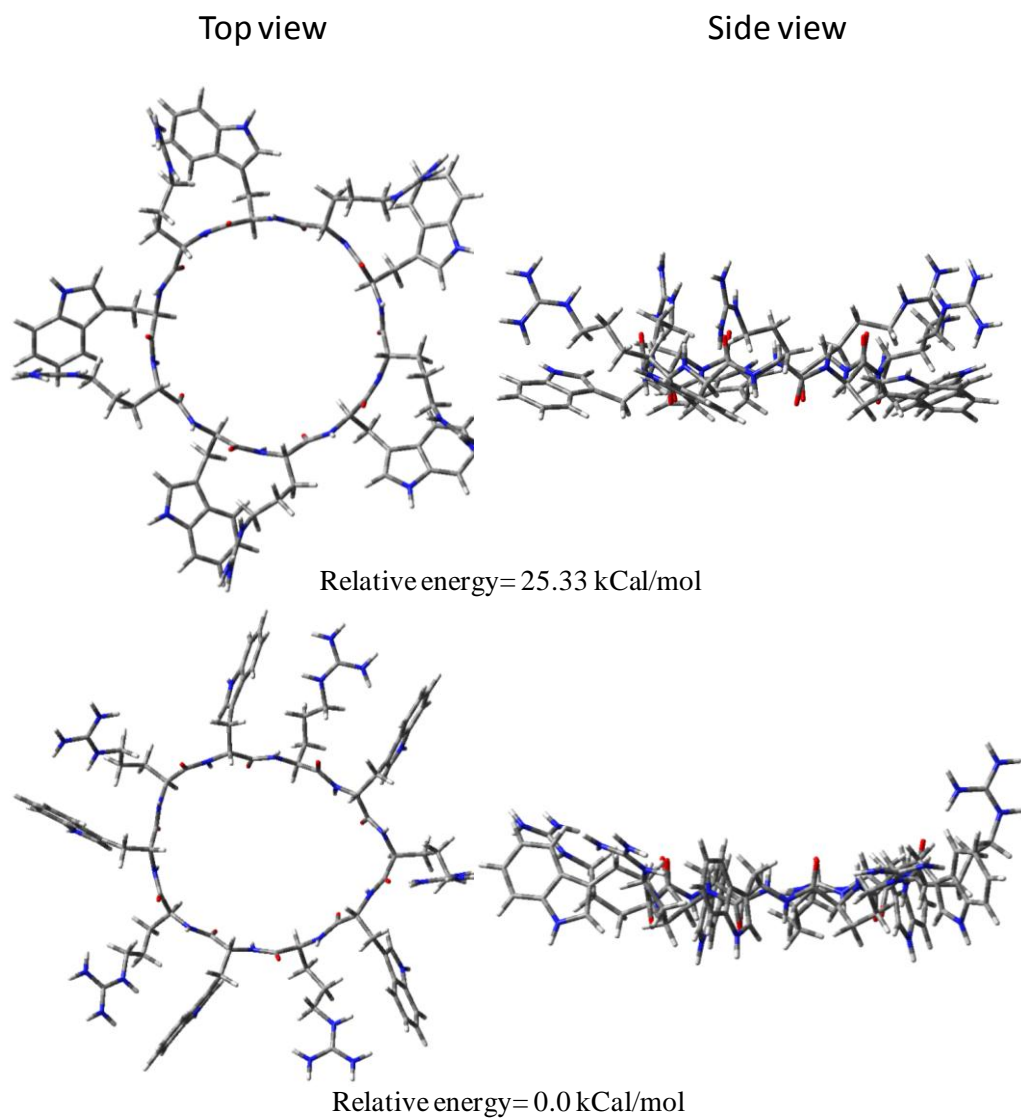

**Fig. S7.** Two different conformers of  $[WR]_5$ .

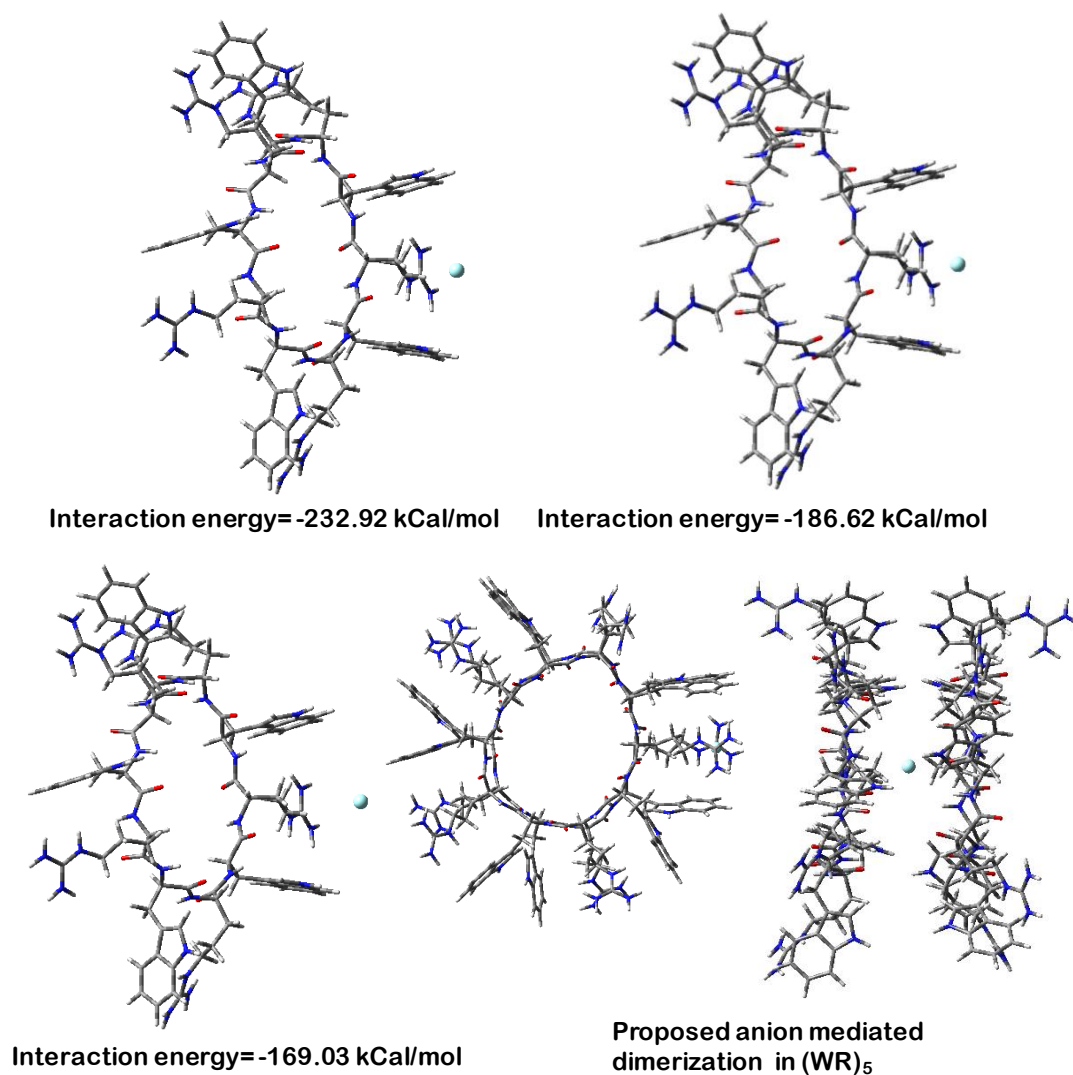

**Fig. S8.** Fluoride counterion-assisted dimerization of  $[WR]_5$ .

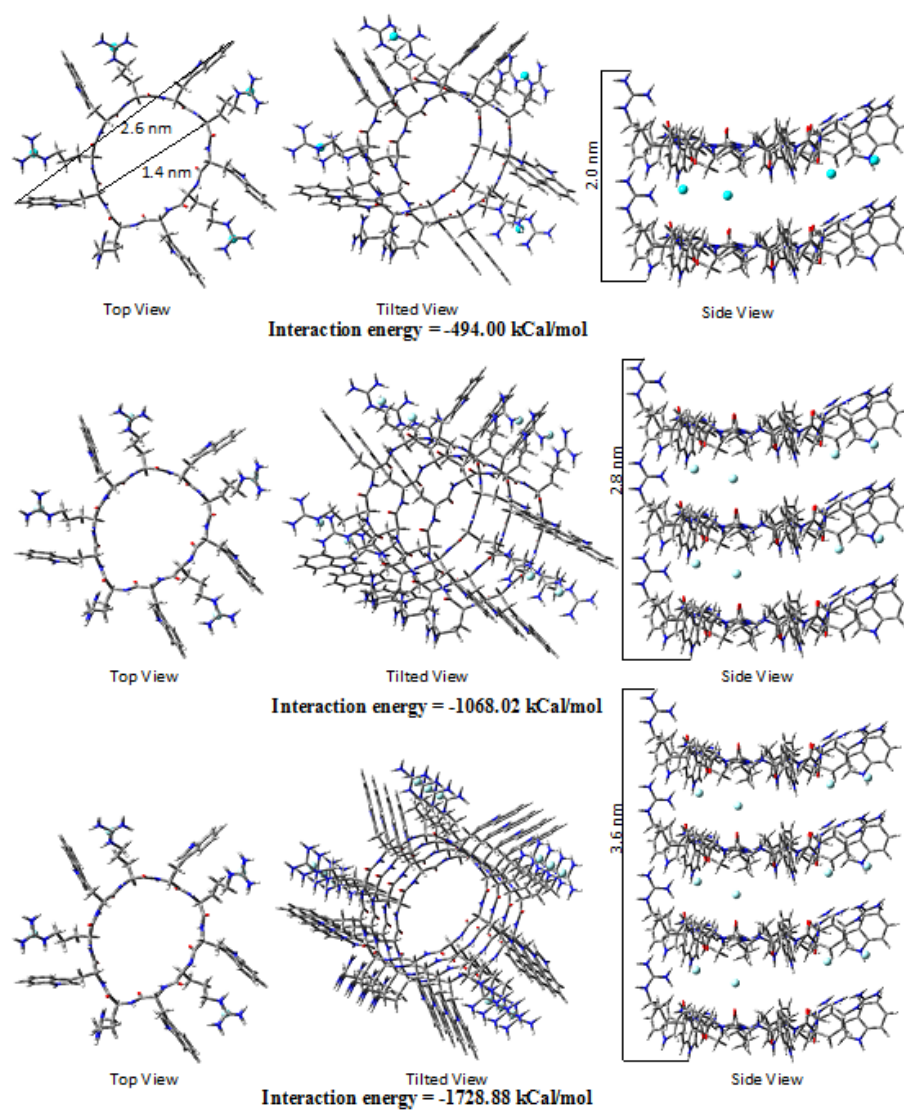

**Fig. S9.** Fluoride counterions-assisted self-assembly of [WR]<sub>5</sub> system.



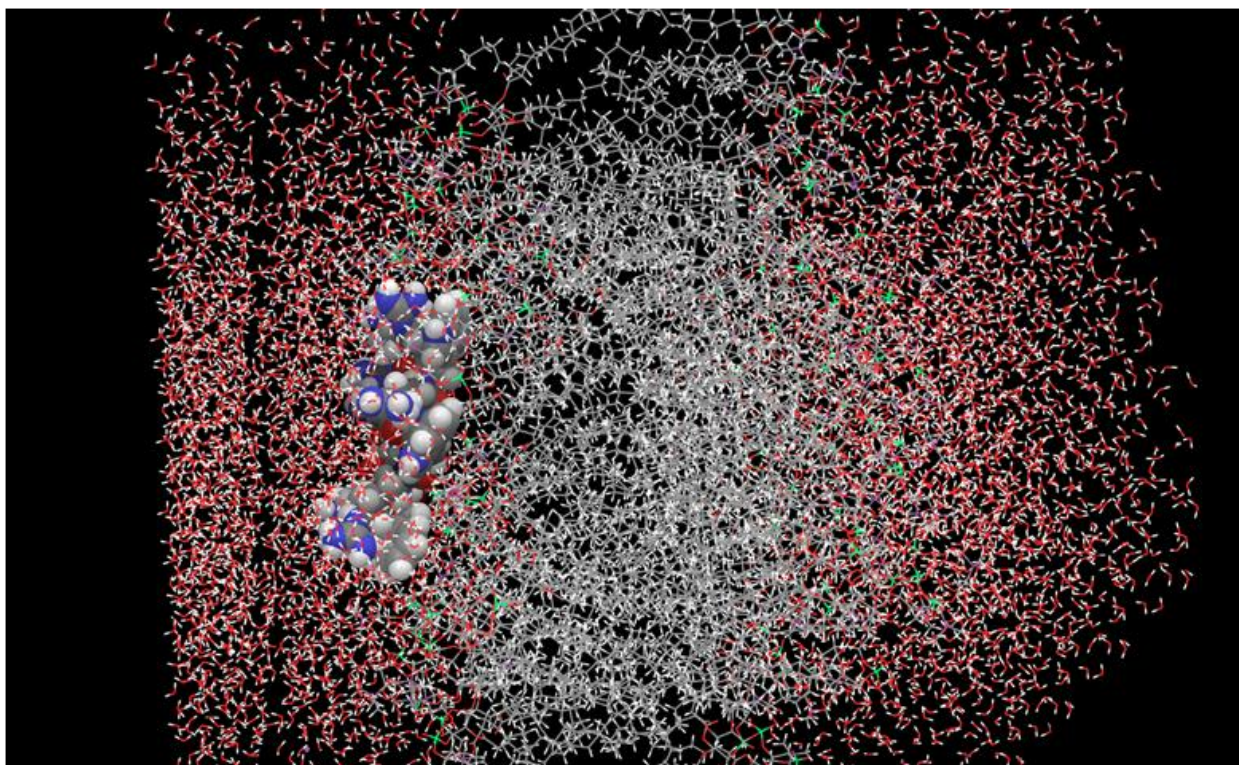

**Fig. S10.** Interaction of the peptide dimer with 1-palmitoyl-2-oleoyl-sn-glycero-3-phosphocholine (POPC) membrane bilayer.

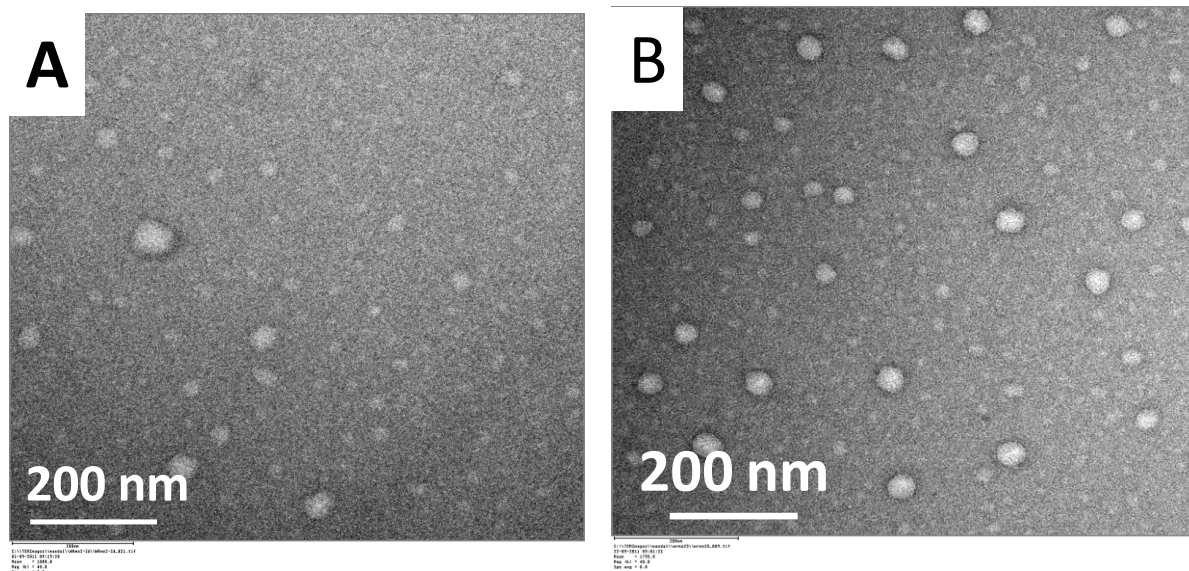

**Fig. S11.** Self-assembly of [WR(Me)<sub>2</sub>]<sub>5</sub> (1 mM, water) after 72 h (A) and after 20 days (B).

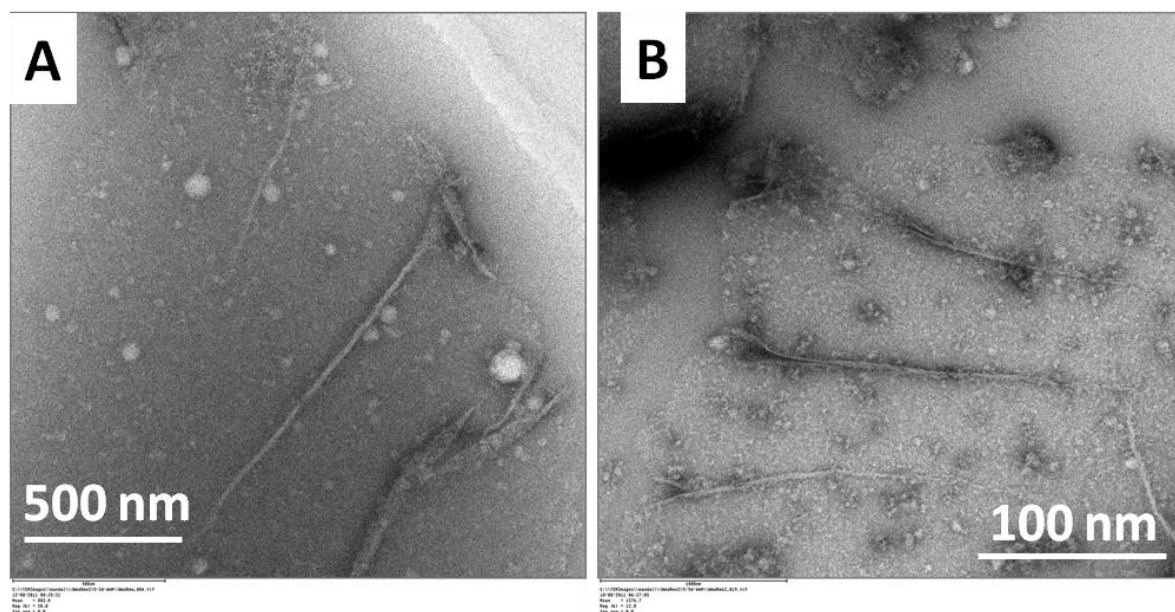

**Fig. S12.** TEM images of self-assembled structures of  $[W_{Me}R(Me)_2]_5$  (4 mM, 5% DMSO in water) after 72 h (A) and after 9 days (B).

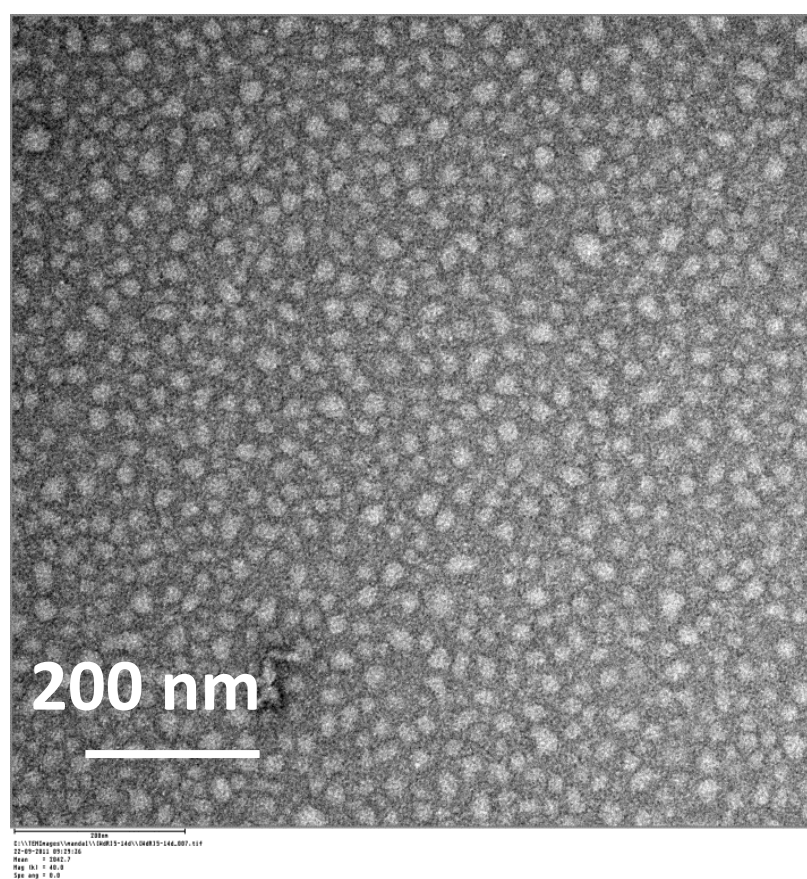

**Fig. S13.** TEM image of self-assembled structures of  $[WdR]_5$  (2 mM, water) after 14 days.

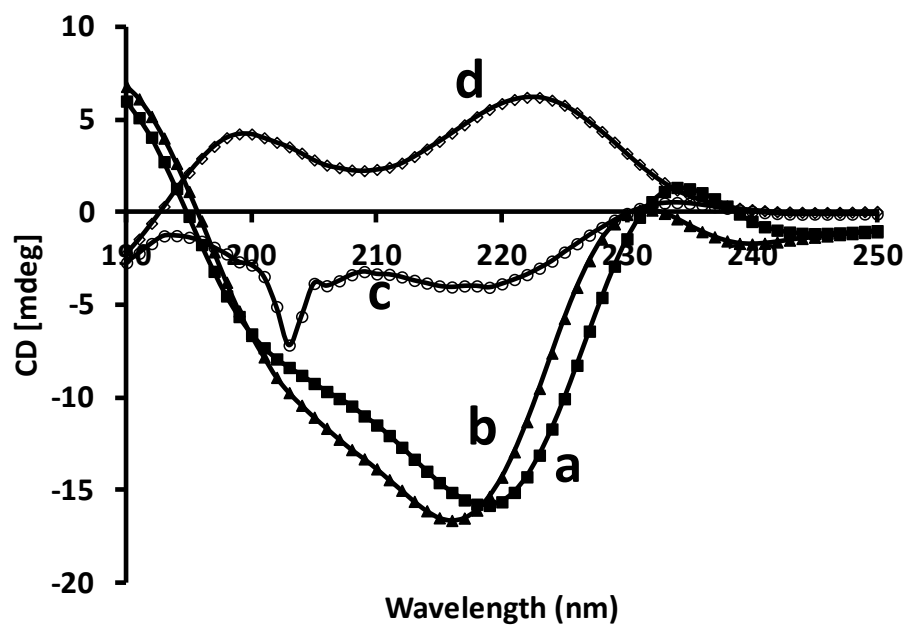

**Fig. S14.** CD spectra of (a)  $[W_{Me}R]_5$ , (b)  $[WR_{(Me)_2}]_5$ , (c)  $[W_{Me}R_{(Me)_2}]_5$ , and (d)  $[WdR]_5$  in water ( $100 \mu\text{M}$ ) at  $20^\circ\text{C}$ .

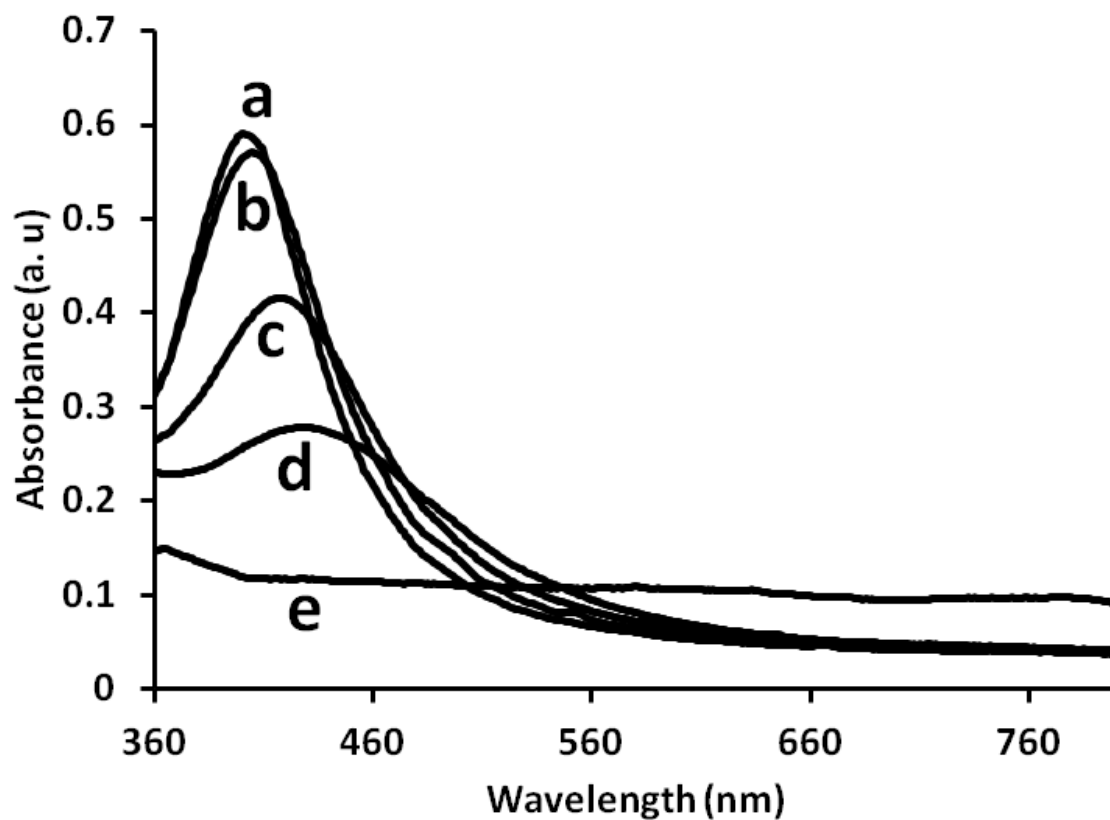

**Fig. S15.** Optimization of [WR]<sub>5</sub> concentration in silver nanoparticles synthesis. (a) 100  $\mu$ M, (b) 200  $\mu$ M, (c) 500  $\mu$ M, (d) 1 mM, and (e) 0  $\mu$ M.

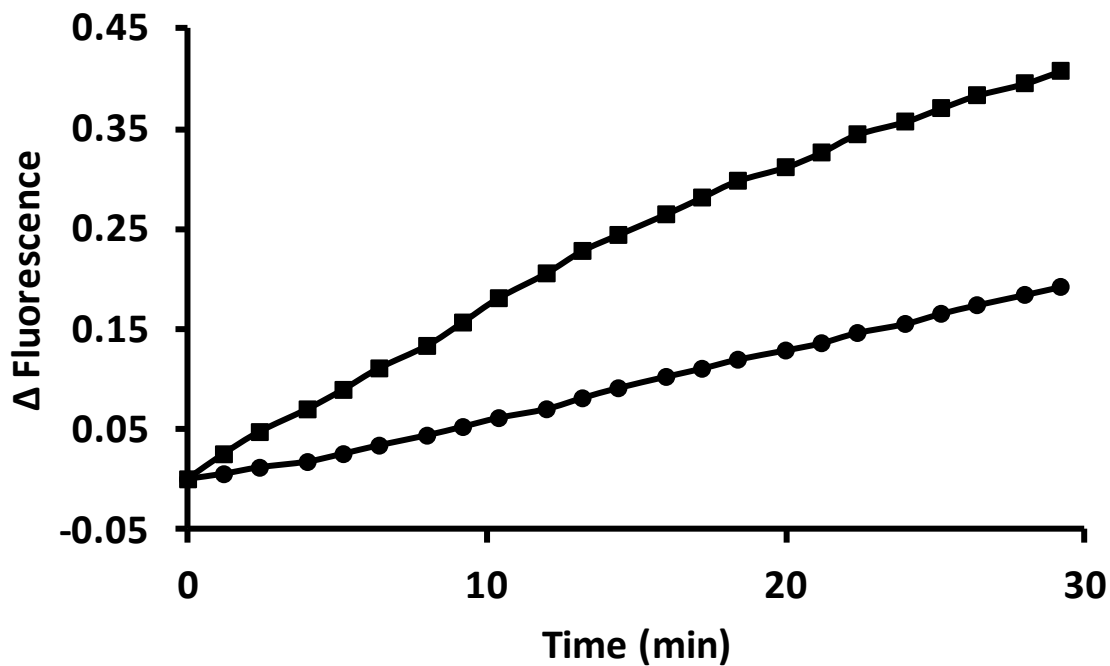

**Fig. S16.** Enzymatic activity of GAPDH at 37° C. (●) GAPDH enzyme in PBS, (■) GAPDH enzyme in PBS with [WR]<sub>5</sub> (100 μM).

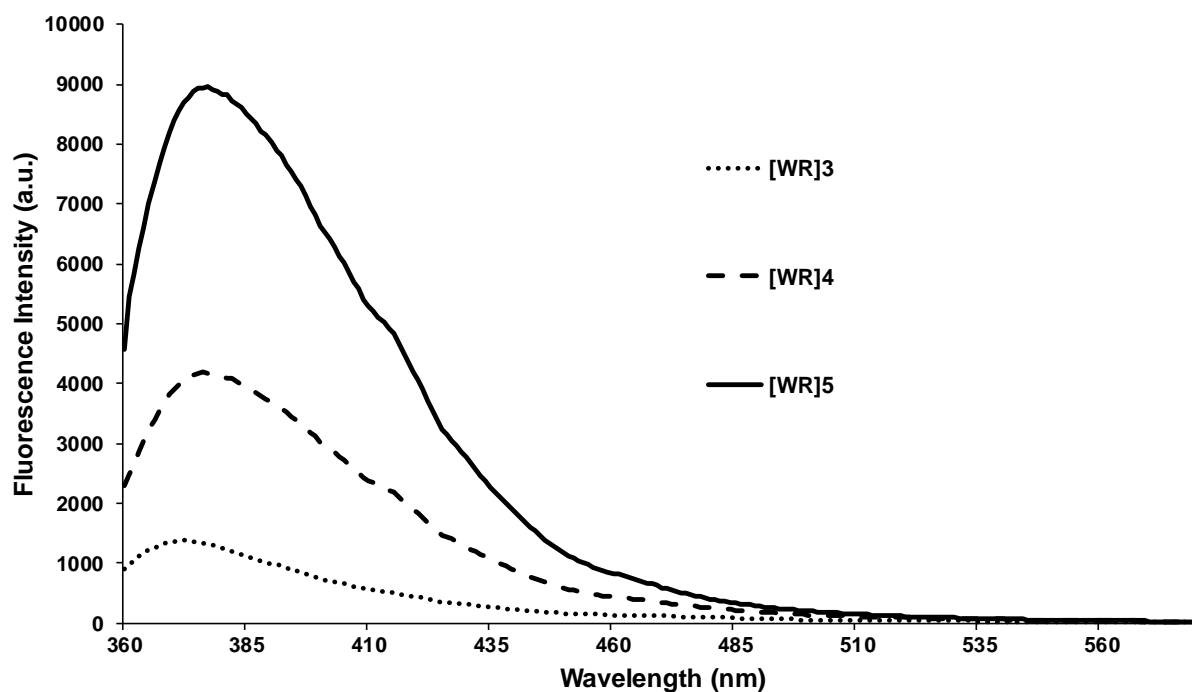

**Fig S17.** Fluorescence spectroscopy of [WR]<sub>n</sub> (n = 3-5) (100 μM) measured at excitation of 280 nm and emission of 360 nm.

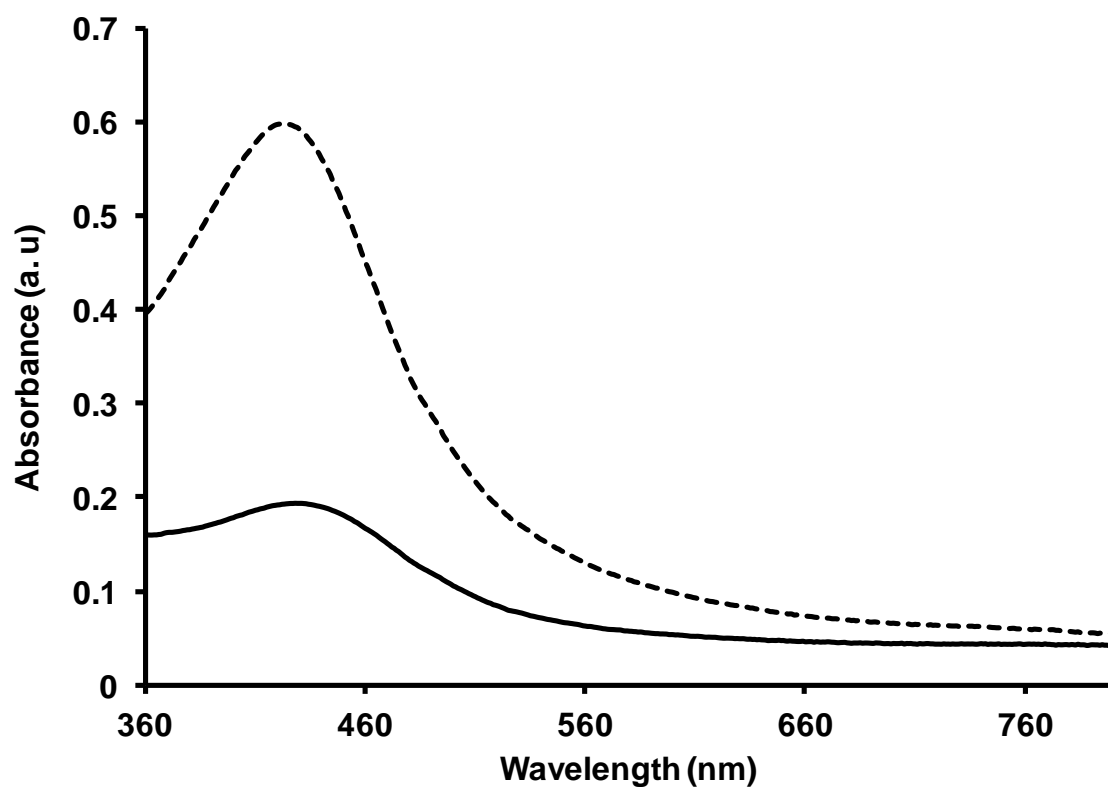

**Fig. S18.** Borohydride reduced silver nanoparticles in presence of cyclic [WR]<sub>5</sub> (dotted line, after one month) and linear (WR)<sub>5</sub> (solid line, after 48 h).

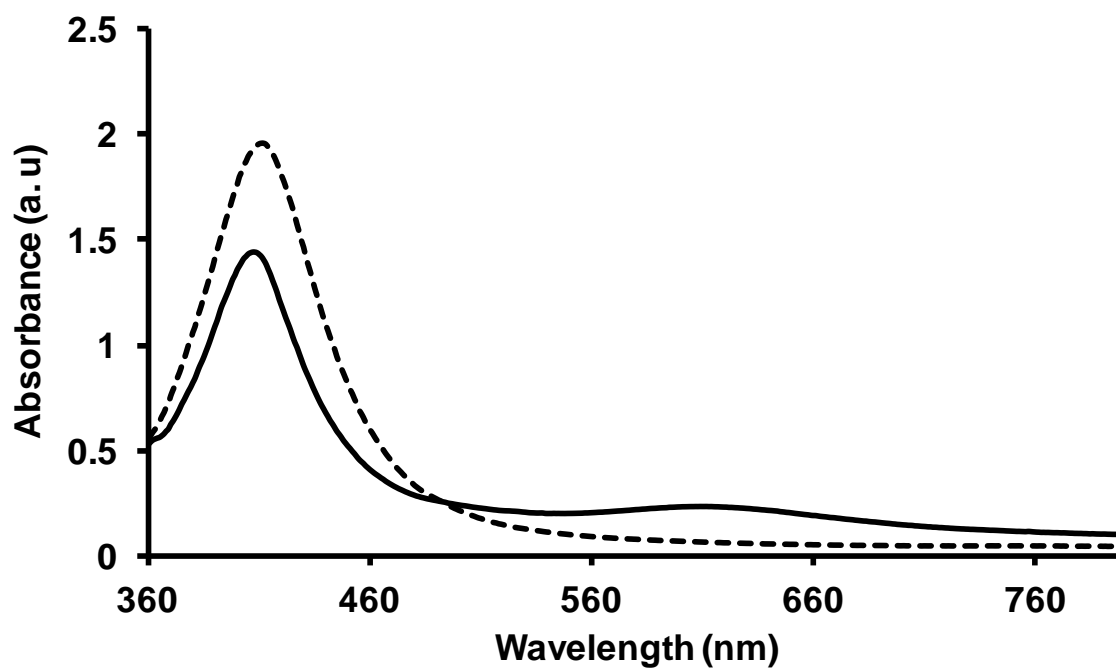

**Fig. S19.** Borohydride reduced silver nanoparticles in presence of CTAB (cetyl trimethylammonium bromide). UV-vis spectra of silver nanoparticles after 15 min (dotted line) and after 4 days (solid line).

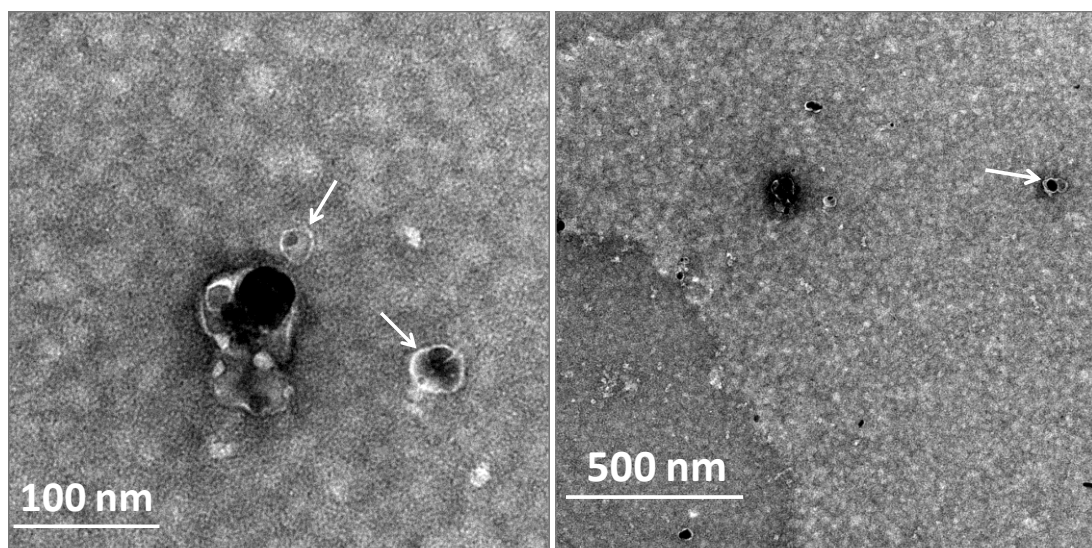

**Fig. S20.** TEM images of borohydride reduced silver nanoparticles in the presence of [WR]<sub>15</sub>.

Peptide coatings on silver nanoparticles are shown by arrows.

**Table S1.** Estimated secondary structures of [WR]<sub>n</sub> (n = 3-5).

| Structure  | [WR] <sub>3</sub> | [WR] <sub>4</sub> | [WR] <sub>5</sub> |
|------------|-------------------|-------------------|-------------------|
| Helix (%)  | 13.1              | 12.9              | 11.5              |
| Beta (%)   | 31.6              | 32.5              | 35.7              |
| Turn (%)   | 12.4              | 12.5              | 12.4              |
| Random (%) | 38.8              | 38.7              | 37.6              |

**Table S2.** Morphology of different [WR] peptides.

| Peptide sequence                                   | Solvent    | Morphology                  |
|----------------------------------------------------|------------|-----------------------------|
| [WR] <sub>5</sub>                                  | Water      | Vesicle-like structures     |
| [WR] <sub>5</sub>                                  | PBS        | Vesicle-like structures     |
| [WR] <sub>5</sub>                                  | 0.02 N HCl | No specific morphology      |
| [W <sub>Me</sub> R] <sub>5</sub>                   | Water      | Tubular structures          |
| [W <sub>Me</sub> R <sub>(Me)2</sub> ] <sub>5</sub> | Water      | Few micelle like structures |
| [WR <sub>(Me)2</sub> ] <sub>5</sub>                | Water      | Vesicle-like structures     |
| [WdR] <sub>5</sub>                                 | Water      | Micelle like structures     |
